# Supplementary material for: Au Nanoparticle-Loaded UiO-66 Metal–Organic Framework for Efficient Photocatalytic N2 Fixation
Source: MDPI journal article supplement (doi:10.3390/pr12010064), 2023-12-27
Supplement: s1 [file s1]

Archive with 1 entries (1 files):
- processes-2749910-supplementary.pdf
