# Supplementary material for: Au Nanoparticle-Loaded UiO-66 Metal–Organic Framework for Efficient Photocatalytic N2 Fixation
Source: MDPI journal article supplement (doi:10.3390/pr12010064), 2023-12-27
Supplement: s1 [file s1 › processes-2749910-supplementary.pdf]

**Supplementary File**

## **Au Nanoparticle-Loaded UiO-66 Metal–Organic Framework for Efficient Photocatalytic N<sub>2</sub> Fixation**

**Zehui Zhao, Guangmin Ren, Xiangchao Meng and Zizhen Li \***

Key Laboratory of Marine Chemistry Theory and Technology, Ministry of Education, College of Chemistry and Chemical Engineering, Ocean University of China, Qingdao 266100, China;

zhaozehui@stu.ouc.edu.cn (Z.Z.); 17568022691@163.com (G.R.);

mengxiangchao@ouc.edu.cn (X.M.)

\* Correspondence: lizizhen@ouc.edu.cn

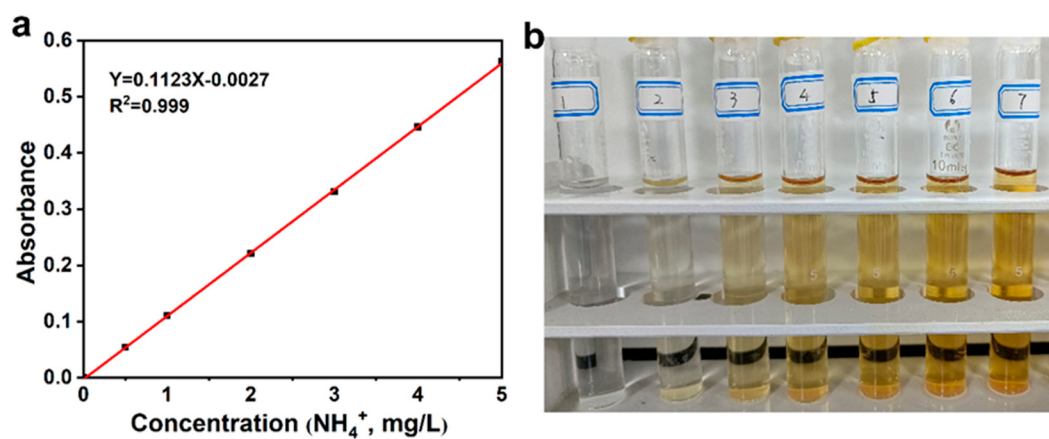

**Figure S1.** (a) Standard curves for  $\text{NH}_4^+$  with Nessler's reagent and (b) The chromogenic reaction of Nessler's reagent with  $\text{NH}_4^+$  ions.

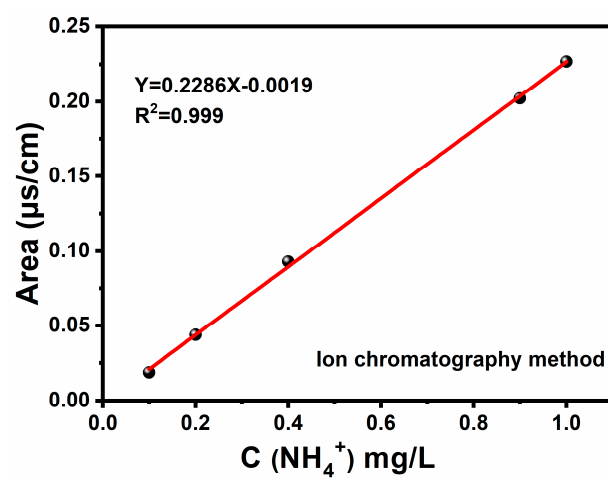

**Figure S2.** Calibration curve used for calculation of NH<sub>4</sub><sup>+</sup> concentrations by Ion chromatogram method.

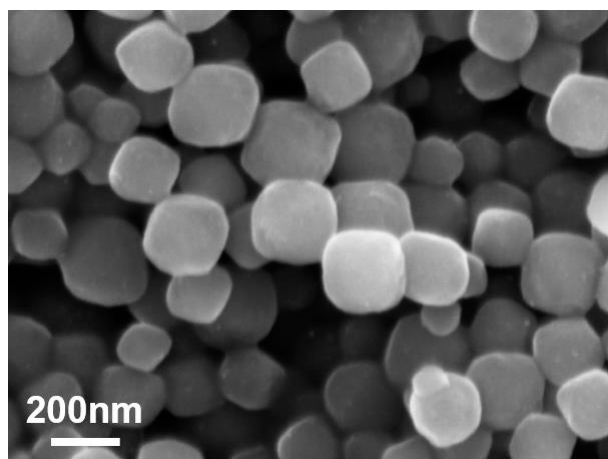

**Figure S3.** SEM image of UiO-66.

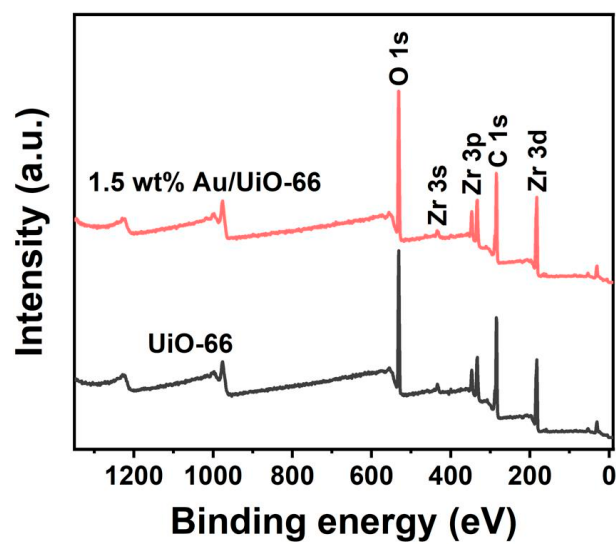

**Figure S4.** XPS survey spectrum of UiO-66 and Au/UiO-66 samples.

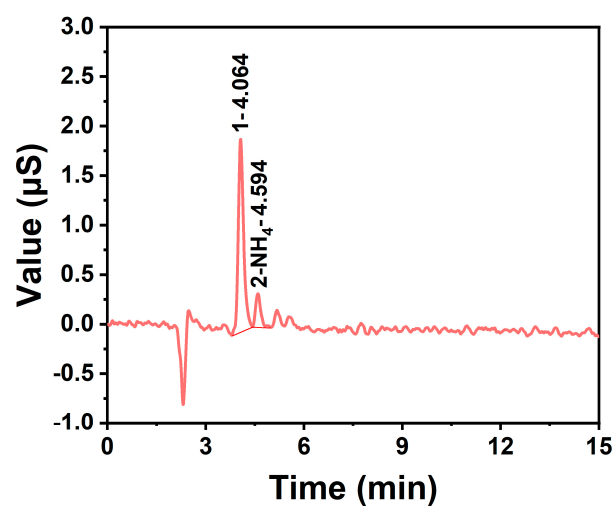

**Figure S5.** Ion chromatography profile.
